# Supplementary material for: A perovskite-type Nd0.75Sr0.25Co0.8Fe0.2O3−δ cathode for advanced solid oxide fuel cells
Source: Royal Society of Chemistry journal article supplement (doi:10.1039/c9cc01054h), 2019-01-01
Supplement: c9cc01054h1.pdf [file c9cc01054h1.pdf]

# Supporting Information

## Perovskite-type $\text{Nd}_{0.75}\text{Sr}_{0.25}\text{Co}_{0.8}\text{Fe}_{0.2}\text{O}_{3-\delta}$ cathode for advanced solid oxide fuel cells

Suresh Mulmi<sup>a</sup> and Venkataraman Thangadurai<sup>a\*</sup>

<sup>a</sup> Department of Chemistry, University of Calgary, 2500 University Drive NW, Calgary, AB, T2N-1N4, Canada. E-mail: vthangad@ucalgary.ca; Tel: +1-403-210-8649

## Figures

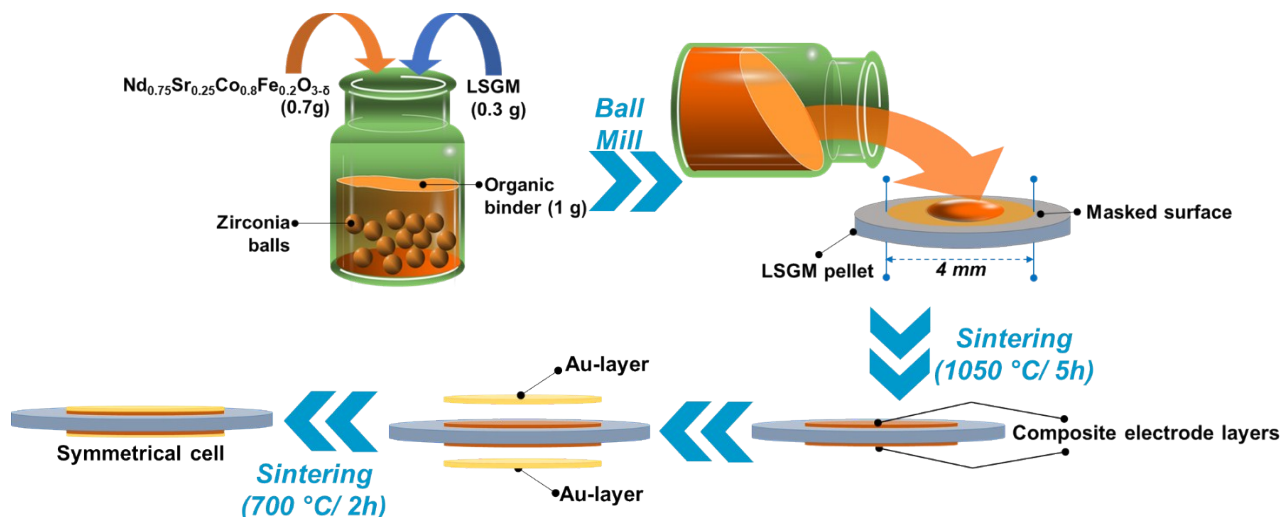

**Figure S1.** Schematic diagram illustrating the half-cell preparation using Nd-based perovskites.

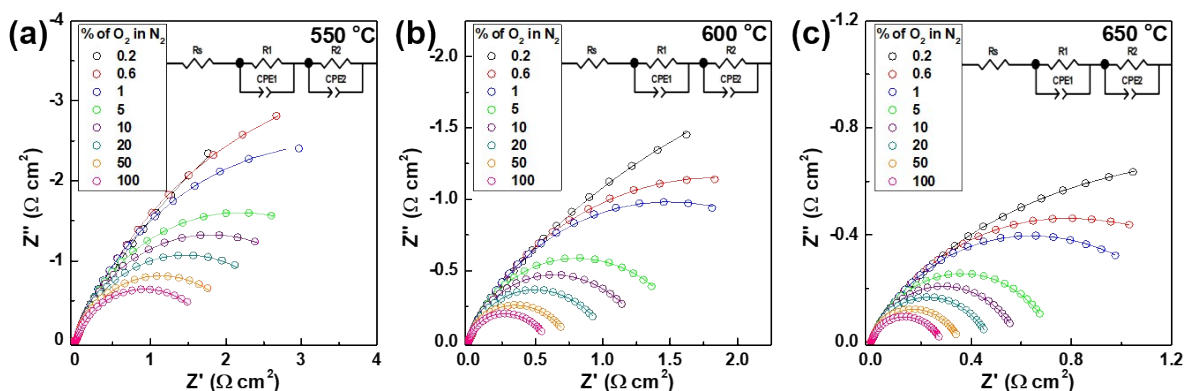

**Figure S2.** Typical Nyquist plot of a symmetrical cell with composite electrode (NSCF+LSGM) layer (electrolyte: LSGM) under OCP at (a) 550 °C, (b) 600 °C and (c) 650 °C with various  $p\text{O}_2$  concentrations ranging from 0.2-100 % (bal. gas =  $\text{N}_2$ ). Data is fitted with two parallel RC circuits (inset) and shown as solid line passing through the original data points (open circles). (Frequency range = 1MHz – 0.1 Hz).

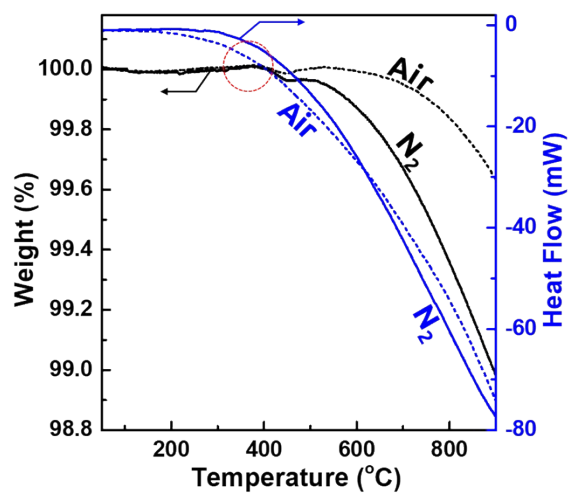

**Figure S3.** TGA (black) and DSC (blue) curves of  $\text{Nd}_{0.75}\text{Sr}_{0.25}\text{Co}_{0.8}\text{Fe}_{0.2}\text{O}_{3-\delta}$  (NSCF) in  $\text{N}_2$  (solid) and air (dotted), respectively. (Heating rate = 5 °C/min)

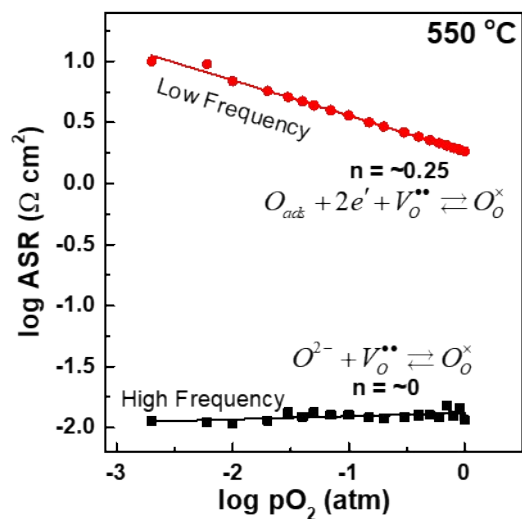

**Figure S4.** Variation of ASRs as a function of  $p\text{O}_2$  at 550 °C for a symmetrical cell with composite electrode (NSCF+LSGM) layer (electrolyte: LSGM) under OCP. “ $n$ ” indicates the slope obtained from  $\text{ASR} = \text{ASR}_o (p\text{O}_2)^{-n}$  and can be translated into the typical reactions occurring at high (■) and low (●) frequency arcs. (Total gas flow = 100 sccm).

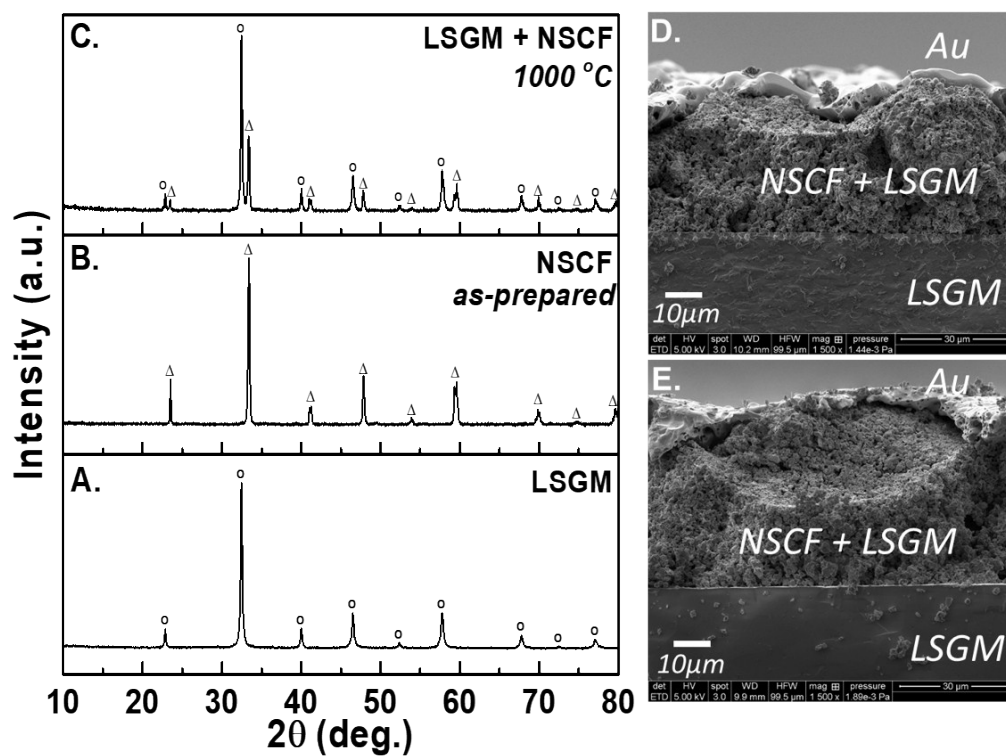

**Figure S5.** PXRD patterns of starting material for composite layer (A) LSGM, (B) as-prepared NSCF and (C) the mixture LSGM+NSCF sintered at 1000 °C for 12 h in air followed by 12 h in CO<sub>2</sub>. Typical cross-section SEM images of a symmetrical cell composed with dense LSGM electrolyte, NSCF+LSGM composite electrode layer and Au current collector (from bottom to top) (D) before and (E) after the half-cell measurements + 24 h pure CO<sub>2</sub> treatment at 800 °C.

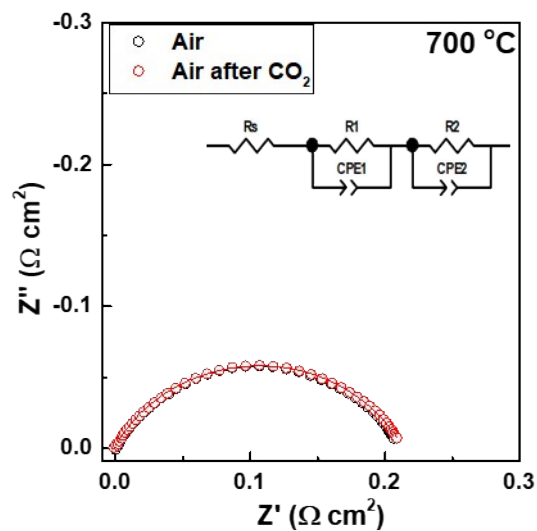

**Figure S6.** Typical Nyquist plot of a symmetrical cell with composite electrode (NSCF+LSGM) layer (electrolyte: LSGM) under OCP at  $700^\circ\text{C}$  in air before (black open circles) and after (red open circles)  $\text{CO}_2$  exposure for 24 h. Data is fitted with two parallel RC circuits (inset) and shown as solid line passing through the original data points (open circles). Ultrapure  $\text{N}_2$  was used as balance gas to adjust the  $p\text{O}_2$ . (Frequency range =  $1\text{MHz} - 0.1\text{ Hz}$ ).

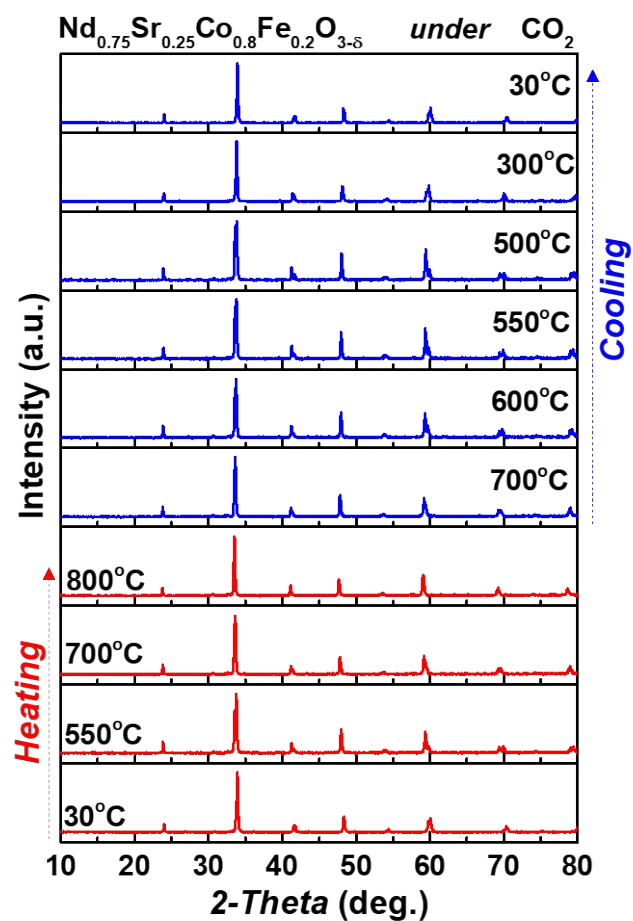

**Figure S7.** In-situ high temperature PXRD patterns of as-prepared  $\text{Nd}_{0.75}\text{Sr}_{0.25}\text{Co}_{0.8}\text{Fe}_{0.2}\text{O}_{3-6}$  under pure  $\text{CO}_2$  obtained from heating (30 – 800 °C; red patterns) and cooling (800 – 30 °C; blue patterns) cycles. (Total gas flow = 20 sccm).

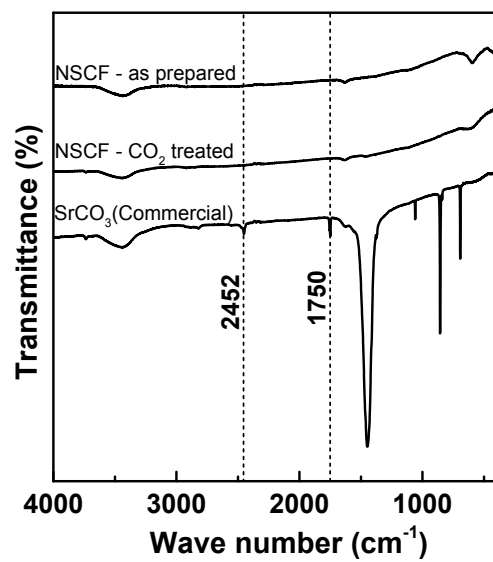

**Figure S8.** FT-IR spectra obtained on  $\text{Nd}_{0.75}\text{Sr}_{0.25}\text{Co}_{0.8}\text{Fe}_{0.2}\text{O}_{3-\delta}$  (NSCF) before and after  $\text{CO}_2$ -treatment at 800 °C for 24h.

## Tables

**Table S1.:** The powder X-ray Rietveld refinement results for  $\text{Nd}_{0.75}\text{Sr}_{0.25}\text{Co}_{0.8}\text{Fe}_{0.2}\text{O}_{3-\delta}$ . ( $R_p = 7.22$ ;  $R_{wp} = 9.12$ ;  $\chi^2 = 1.23$ ;  $a = 5.3816(3)$  Å,  $b = 7.6218(1)$  Å,  $c = 5.4191(7)$  Å; space group =  $Pnma$ )

| Atom | Wyckoff-site | $x/a$      | $y/b$     | $z/c$      | Occupancy | $U_{iso}$ (Å <sup>2</sup> ) |
|------|--------------|------------|-----------|------------|-----------|-----------------------------|
| Nd   | 4c           | -0.0192(2) | 1/4       | -0.0002(3) | 0.75      | 0.0195(3)                   |
| Sr   | 4c           | -0.0192(2) | 1/4       | -0.0002(3) | 0.25      | 0.0195(3)                   |
| Co   | 4b           | 0          | 0         | 1/2        | 0.80      | 0.0222(9)                   |
| Fe   | 4b           | 0          | 0         | 1/2        | 0.20      | 0.0081(8)                   |
| O1   | 4c           | 1/2        | 1/4       | 0.0726     | 1.00      | 0.1016(3)                   |
| O2   | 8d           | 0.2459(4)  | 0.0239(6) | 0.7947(2)  | 0.99      | 0.0257(6)                   |

**Table S2.** ASRs under various  $p\text{O}_2$  ( $\sim 10^{-2} - 1$  atm) in the temperature range 550-700 °C.

| $p\text{O}_2$<br>(atm) | $R_p$ (Ω. cm <sup>2</sup> ) |        |        |        |
|------------------------|-----------------------------|--------|--------|--------|
|                        | 550 °C                      | 600 °C | 650 °C | 700 °C |
| 0.02                   | 10.04                       | 5.82   | 3.12   | 2.14   |
| 0.2                    | 2.95                        | 1.02   | 0.48   | 0.21   |
| 1                      | 1.85                        | 0.58   | 0.28   | 0.12   |

**Table S3a.** 2-Theta, *d*-spacing and corresponding (hkl) of La<sub>0.8</sub>Sr<sub>0.2</sub>Ga<sub>0.8</sub>Mg<sub>0.2</sub>O<sub>3-δ</sub> (LSGM) and LSGM in composite with NSCF as illustrated in Figs. S5A and S5C, respectively.

| La <sub>0.8</sub> Sr <sub>0.2</sub> Ga <sub>0.8</sub> Mg <sub>0.2</sub> O <sub>3-δ</sub> (LSGM) |                          |       | LSGM in composite* |                          |
|-------------------------------------------------------------------------------------------------|--------------------------|-------|--------------------|--------------------------|
| 2θ<br>(deg.)                                                                                    | <i>d</i> -spacing<br>(Å) | (hkl) | 2θ<br>(deg.)       | <i>d</i> -spacing<br>(Å) |
| 22.847                                                                                          | 3.8892                   | (001) | 22.859             | 3.8872                   |
| 32.549                                                                                          | 2.7561                   | (011) | 32.462             | 2.7538                   |
| 40.001                                                                                          | 2.2521                   | (111) | 40.019             | 2.2511                   |
| 46.499                                                                                          | 1.9514                   | (002) | 46.521             | 1.9505                   |
| 52.359                                                                                          | 1.7459                   | (012) | 52.426             | 1.7439                   |
| 57.778                                                                                          | 1.5944                   | (112) | 57.767             | 1.5947                   |
| 67.759                                                                                          | 1.3818                   | (022) | 67.772             | 1.3816                   |
| 72.456                                                                                          | 1.3033                   | (122) | 72.537             | 1.3025                   |
| 77.04                                                                                           | 1.2368                   | (013) | 77.074             | 1.2364                   |

**Table S3b.** 2-Theta, *d*-spacing and corresponding (hkl) of as-prepared Nd<sub>0.75</sub>Sr<sub>0.25</sub>Co<sub>0.8</sub>Fe<sub>0.2</sub>O<sub>3-δ</sub> (NSCF) and NSCF in composite with LSGM as illustrated in Figs. S5B and S5C, respectively.

| Nd <sub>0.75</sub> Sr <sub>0.25</sub> Co <sub>0.8</sub> Fe <sub>0.2</sub> O <sub>3-δ</sub> (NSCF) |                          |       | NSCF in composite* |                          |
|---------------------------------------------------------------------------------------------------|--------------------------|-------|--------------------|--------------------------|
| 2θ<br>(deg.)                                                                                      | <i>d</i> -spacing<br>(Å) | (hkl) | 2θ<br>(deg.)       | <i>d</i> -spacing<br>(Å) |
| 23.477                                                                                            | 3.7861                   | (101) | 23.476             | 3.7863                   |
| 33.358                                                                                            | 2.6838                   | (121) | 33.377             | 2.6823                   |
| 41.048                                                                                            | 2.1986                   | (022) | 41.019             | 2.1985                   |
| 41.222                                                                                            | 2.1882                   | (220) | 41.246             | 2.1869                   |
| 47.78                                                                                             | 1.902                    | (202) | 47.806             | 1.9011                   |
| 47.891                                                                                            | 1.8979                   | (040) | 47.931             | 1.8964                   |
| 53.877                                                                                            | 1.7003                   | (222) | 53.93              | 1.6987                   |
| 59.32                                                                                             | 1.5566                   | (123) | 59.399             | 1.5547                   |
| 59.561                                                                                            | 1.5509                   | (240) | 59.621             | 1.5494                   |
| 69.839                                                                                            | 1.3456                   | (242) | 69.898             | 1.3447                   |
| 70.039                                                                                            | 1.3423                   | (400) | 70.101             | 1.3413                   |
| 74.713                                                                                            | 1.2695                   | (143) | 74.899             | 1.2668                   |
| 79.579                                                                                            | 1.2036                   | (323) | 79.694             | 1.2022                   |

\*composite made of 1:1 weight ratio of LSGM+NSCF.
